# Supplementary material
Source: PubMed Central journal article supplement (PMC3911054)
Supplement: AEM.03564-13_zam999105133so1.pdf [file AEM.03564-13_zam999105133so1.pdf]

TABLE S1 Pairwise comparison of the number of nucleotide differences (lower diagonal) and percent sequence similarity (upper diagonal) between different members of the genus *Rickettsiella*

| Taxon                                                    | Accession no. | 1  | 2    | 3    | 4    | 5    | 6    | 7    | 8    | 9    | 10   | 11   | 12   | 13   | 14   | 15   | 16   | 17   | 18   | 19   | 20   |
|----------------------------------------------------------|---------------|----|------|------|------|------|------|------|------|------|------|------|------|------|------|------|------|------|------|------|------|
| 1 <i>'R. costelytrae'</i> <sup>1</sup>                   | JF490030      | -  | 99.8 | 99.9 | 99.8 | 99.8 | 99.5 | 99.7 | 99.4 | 99.4 | 97.6 | 96.5 | 97.9 | 97.4 | 97.5 | 94.4 | 95.2 | 95.1 | 97.1 | 94.5 | 97.1 |
| 2 <i>'R. tipulae'</i> <sup>1</sup>                       | EU180598      | 3  | -    | 99.8 | 99.7 | 99.7 | 99.4 | 99.6 | 99.1 | 99.2 | 97.5 | 96.4 | 97.9 | 97.2 | 97.3 | 94.2 | 95.0 | 95.0 | 97.1 | 94.5 | 97.1 |
| 3 <i>'R. melolonthae'</i> <sup>1</sup>                   | EF408231      | 1  | 2    | -    | 99.8 | 99.8 | 99.6 | 99.8 | 99.2 | 99.3 | 97.5 | 96.5 | 98.0 | 97.3 | 97.5 | 94.2 | 95.1 | 95.1 | 97.1 | 94.5 | 97.1 |
| 4 <i>'R. agriotidis'</i> <sup>1</sup>                    | HQ640943      | 3  | 4    | 2    | -    | 99.7 | 99.4 | 99.6 | 99.1 | 99.1 | 97.4 | 96.3 | 97.9 | 97.3 | 97.4 | 94.1 | 94.9 | 95.2 | 97.1 | 94.4 | 97.1 |
| 5 ex <i>Myrmeleon bore</i> <sup>1</sup>                  | AB291637      | 3  | 4    | 2    | 4    | -    | 99.6 | 99.8 | 98.9 | 99.1 | 97.5 | 96.3 | 98.0 | 97.2 | 97.3 | 94.2 | 94.9 | 94.9 | 97.0 | 94.4 | 97.0 |
| 6 ex <i>Poecilus chalcities</i> <sup>1</sup>             | EF608533      | 6  | 7    | 5    | 7    | 5    | -    | 99.5 | 98.9 | 98.9 | 97.0 | 96.0 | 97.6 | 96.9 | 97.0 | 94.0 | 94.8 | 94.8 | 96.7 | 94.2 | 98.6 |
| 7 ex <i>Harpalus pennsylvanicus</i> <sup>3</sup>         | GU815103      | 4  | 5    | 3    | 5    | 2    | 5    | -    | 99.0 | 99.0 | 97.2 | 96.1 | 97.6 | 97.1 | 97.2 | 94.1 | 94.9 | 94.7 | 96.8 | 94.2 | 98.6 |
| 8 ex <i>Eisenia fetida</i> <sup>1</sup>                  | FJ542982      | 8  | 11   | 9    | 14   | 11   | 14   | 12   | -    | 99.7 | 97.3 | 96.5 | 97.6 | 97.3 | 97.3 | 94.1 | 95.2 | 95.1 | 97.1 | 94.2 | 97.0 |
| 9 ex <i>Folsomia candida</i> <sup>4</sup>                | AF327558      | 8  | 10   | 9    | 11   | 11   | 14   | 12   | 4    | -    | 97.6 | 96.4 | 97.6 | 97.3 | 97.3 | 94.3 | 95.1 | 94.9 | 97.1 | 94.1 | 96.9 |
| 10 <i>R. grylli</i> ex <i>Gryllus</i> <sup>1</sup>       | U97545        | 30 | 32   | 32   | 33   | 32   | 37   | 35   | 33   | 30   | -    | 97.2 | 96.3 | 96.4 | 97.3 | 94.1 | 94.8 | 95.1 | 96.2 | 93.8 | 96.0 |
| 11 <i>'R. ixodidis'</i> <sup>2</sup>                     | AF383621      | 44 | 46   | 45   | 47   | 47   | 51   | 49   | 44   | 36   | 35   | -    | 95.1 | 96.2 | 96.4 | 93.5 | 94.2 | 94.3 | 95.2 | 93.3 | 95.5 |
| 12 <i>'R. angustus'</i> <sup>1</sup>                     | HF912419      | 26 | 27   | 25   | 27   | 25   | 30   | 30   | 30   | 30   | 46   | 62   | -    | 96.2 | 96.2 | 93.9 | 94.1 | 93.4 | 96.3 | 93.5 | 96.3 |
| 13 <i>'R. kingi'</i> <sup>1</sup>                        | HF912421      | 33 | 35   | 34   | 34   | 35   | 39   | 37   | 34   | 34   | 39   | 47   | 49   | -    | 98.9 | 93.8 | 94.1 | 94.4 | 94.9 | 96.1 | 96.7 |
| 14 <i>'R. sculptus'</i> <sup>1</sup>                     | HF912420      | 32 | 34   | 32   | 33   | 34   | 38   | 35   | 33   | 33   | 33   | 46   | 49   | 14   | -    | 94.0 | 94.3 | 95.3 | 95.2 | 96.3 | 96.4 |
| 15 ex <i>Ceciotrioza sozanica</i> <sup>6</sup>           | AF286124      | 71 | 72   | 72   | 74   | 72   | 75   | 75   | 74   | 72   | 74   | 83   | 77   | 78   | 75   | -    | 95.8 | 94.4 | 94.0 | 93.0 | 93.4 |
| 16 ex Oribatid mites <sup>5</sup>                        | GU906700      | 61 | 62   | 63   | 62   | 64   | 64   | 65   | 65   | 61   | 62   | 65   | 74   | 75   | 72   | 53   | -    | 95.0 | 94.9 | 94.2 | 94.6 |
| 17 ex <i>Acyrtosiphon pisum</i> <sup>3</sup>             | AB522704      | 62 | 63   | 62   | 62   | 64   | 66   | 66   | 62   | 65   | 62   | 73   | 76   | 72   | 62   | 71   | 63   | -    | 95.4 | 93.6 | 94.4 |
| 18 ex <i>Asellus aquaticus</i> <sup>7</sup>              | AY447040      | 36 | 37   | 37   | 36   | 38   | 42   | 40   | 36   | 37   | 47   | 61   | 47   | 64   | 61   | 74   | 64   | 57   | -    | 93.9 | 96.0 |
| 19 <i>Diplorickettsia massiliensis</i> <sup>5</sup>      | GQ857549      | 69 | 70   | 70   | 72   | 72   | 73   | 73   | 74   | 75   | 73   | 85   | 82   | 49   | 47   | 88   | 73   | 81   | 77   | -    | 94.2 |
| 20 <i>R. grylli</i> ex <i>Armadillidium</i> <sup>1</sup> | AAQJ02000001  | 36 | 37   | 37   | 37   | 38   | 40   | 40   | 37   | 39   | 50   | 57   | 47   | 41   | 45   | 83   | 68   | 71   | 50   | 74   | -    |

<sup>1</sup>1255 bp, <sup>2</sup>1269 bp, <sup>3</sup>1256 bp, <sup>4</sup>1253 bp, <sup>5</sup>1260 bp, <sup>6</sup>1259 bp and <sup>7</sup>1257 bp

TABLE S2 Pairwise comparison of the number of nucleotide differences (lower diagonal) and percent sequence similarity (upper diagonal) of *rpsA* between different members of the genus *Rickettsiella*

| Taxon                                    | Accession no. | 1  | 2   | 3    | 4    | 5    | 6    | 7    | 8    | 9    |
|------------------------------------------|---------------|----|-----|------|------|------|------|------|------|------|
| 1 ' <i>R. costelytrae</i> ' <sup>1</sup> | JN695774      | -  | 100 | 96.8 | 96.3 | 97.4 | 89.1 | 91.9 | 90.9 | 91.7 |
| 2 ' <i>R. pyronotae</i> ' <sup>1</sup>   | JN695775      | 0  | -   | 96.6 | 96.3 | 97.4 | 89.1 | 91.9 | 90.9 | 91.7 |
| 3 ' <i>R. tipulae</i> ' <sup>1</sup>     | JF288930      | 29 | 29  | -    | 97.3 | 98.9 | 88.9 | 92.3 | 91.3 | 91.8 |
| 4 ' <i>R. melolonthae</i> ' <sup>1</sup> | EF694043      | 33 | 33  | 24   | -    | 98.0 | 88.2 | 91.4 | 90.6 | 91.5 |
| 5 ' <i>R. agriotidis</i> ' <sup>1</sup>  | JN695773      | 23 | 23  | 10   | 18   | -    | 79.0 | 92.5 | 91.4 | 92.1 |
| 6 ' <i>R. ixodidis</i> ' <sup>1</sup>    | JQ070346      | 97 | 97  | 99   | 104  | 95   | -    | 87.5 | 90.4 | 90.6 |
| 7 ' <i>R. angustus</i> ' <sup>1</sup>    | HG792868      | 72 | 72  | 69   | 76   | 67   | 112  | -    | 85.6 | 90.2 |
| 8 ' <i>R. kingi</i> ' <sup>1</sup>       | HG792869      | 81 | 81  | 78   | 84   | 76   | 86   | 93   | -    | 97.5 |
| 9 ' <i>R. sculptus</i> ' <sup>1</sup>    | HG792870      | 74 | 74  | 73   | 76   | 71   | 84   | 88   | 22   | -    |

<sup>1</sup>894 bp

TABLE S3 Pairwise comparison of the number of amino acid differences (lower diagonal) and percent sequence similarity (upper diagonal) of *rpsA* between different members of the genus *Rickettsiella*

| Taxon                                    | Accession no. | 1  | 2   | 3    | 4    | 5    | 6    | 7    | 8    | 9    |
|------------------------------------------|---------------|----|-----|------|------|------|------|------|------|------|
| 1 ' <i>R. costelytrae</i> ' <sup>1</sup> | JN695774      | -  | 100 | 99.7 | 99.7 | 100  | 97.0 | 98.0 | 96.6 | 98.0 |
| 2 ' <i>R. pyronotae</i> ' <sup>1</sup>   | JN695775      | 0  | -   | 99.7 | 99.7 | 100  | 97.0 | 98.0 | 96.6 | 98.0 |
| 3 ' <i>R. tipulae</i> ' <sup>1</sup>     | JF288930      | 1  | 1   | -    | 99.3 | 99.7 | 96.6 | 97.7 | 96.3 | 97.7 |
| 4 ' <i>R. melolonthae</i> ' <sup>1</sup> | EF694043      | 1  | 1   | 2    | -    | 99.7 | 96.6 | 97.7 | 96.3 | 97.7 |
| 5 ' <i>R. agriotidis</i> ' <sup>1</sup>  | JN695773      | 0  | 0   | 1    | 1    | -    | 99.7 | 98.0 | 96.6 | 98.0 |
| 6 ' <i>R. ixodidis</i> ' <sup>1</sup>    | JQ070346      | 9  | 9   | 10   | 10   | 9    | -    | 95.0 | 94.6 | 95.6 |
| 7 ' <i>R. angustus</i> ' <sup>1</sup>    | HG792868      | 6  | 6   | 7    | 7    | 6    | 15   | -    | 95.3 | 96.6 |
| 8 ' <i>R. kingi</i> ' <sup>1</sup>       | HG792869      | 10 | 10  | 11   | 11   | 10   | 16   | 14   | -    | 98.0 |
| 9 ' <i>R. sculptus</i> ' <sup>1</sup>    | HG792870      | 6  | 6   | 7    | 7    | 6    | 13   | 10   | 6    | -    |

<sup>1</sup>298 aa

TABLE S4 Pairwise comparison of the number of nucleotide differences (lower diagonal) and percent sequence similarity (upper diagonal) of *gidA* between different members of the genus *Rickettsiella*

| Taxon                                    | Accession no. | 1   | 2    | 3    | 4    | 5    | 6    | 7    | 8    | 9    |
|------------------------------------------|---------------|-----|------|------|------|------|------|------|------|------|
| 1 ' <i>R. costelytrae</i> ' <sup>1</sup> | JN565689      | -   | 99.6 | 95.7 | 95.2 | 96.1 | 84.7 | 87.9 | 88.8 | 88.3 |
| 2 ' <i>R. pyronotae</i> ' <sup>1</sup>   | JN565691      | 3   | -    | 95.5 | 95.0 | 95.9 | 84.9 | 87.8 | 88.5 | 88.2 |
| 3 ' <i>R. tipulae</i> ' <sup>1</sup>     | JF288927      | 34  | 35   | -    | 96.8 | 97.6 | 84.4 | 87.8 | 88.1 | 88.3 |
| 4 ' <i>R. melolonthae</i> ' <sup>2</sup> | EF694040      | 38  | 39   | 25   | -    | 98.2 | 84.0 | 87.8 | 88.3 | 88.1 |
| 5 ' <i>R. agriotidis</i> ' <sup>2</sup>  | JN565687      | 21  | 29   | 19   | 14   | -    | 84.4 | 88.2 | 88.3 | 88.1 |
| 6 ' <i>R. ixodidis</i> ' <sup>1</sup>    | JQ070345      | 120 | 119  | 123  | 126  | 123  | -    | 83.5 | 86.7 | 87.0 |
| 7 ' <i>R. angustus</i> ' <sup>2</sup>    | HG792871      | 95  | 96   | 96   | 96   | 93   | 130  | -    | 86.7 | 86.3 |
| 8 ' <i>R. kingi</i> ' <sup>2</sup>       | HG792872      | 88  | 90   | 93   | 92   | 92   | 105  | 105  | -    | 98.1 |
| 9 ' <i>R. sculptus</i> ' <sup>2</sup>    | HG792873      | 92  | 93   | 92   | 93   | 93   | 102  | 108  | 15   | -    |

<sup>1</sup>786 bp, <sup>2</sup>787 bp

TABLE S5 Pairwise comparison of the number of amino acid differences (lower diagonal) and percent sequence similarity (upper diagonal) of *gidA* between different members of the genus *Rickettsiella*

| Taxon                                    | Accession no. | 1  | 2   | 3    | 4    | 5    | 6    | 7    | 8    | 9    |
|------------------------------------------|---------------|----|-----|------|------|------|------|------|------|------|
| 1 ' <i>R. costelytrae</i> ' <sup>1</sup> | JN565689      | -  | 100 | 97.3 | 96.2 | 96.9 | 91.2 | 93.1 | 92.3 | 92.7 |
| 2 ' <i>R. pyronotae</i> ' <sup>1</sup>   | JN565691      | 0  | -   | 97.3 | 96.2 | 96.9 | 91.2 | 93.1 | 92.3 | 92.7 |
| 3 ' <i>R. tipulae</i> ' <sup>1</sup>     | JF288927      | 7  | 7   | -    | 97.3 | 98.1 | 90.4 | 92.7 | 93.5 | 93.9 |
| 4 ' <i>R. melolonthae</i> ' <sup>1</sup> | EF694040      | 10 | 10  | 7    | -    | 97.7 | 89.7 | 92.7 | 92.7 | 93.1 |
| 5 ' <i>R. agriotidis</i> ' <sup>1</sup>  | JN565687      | 8  | 8   | 5    | 6    | -    | 89.7 | 92.7 | 92.7 | 93.1 |
| 6 ' <i>R. ixodidis</i> ' <sup>1</sup>    | JQ070345      | 23 | 23  | 25   | 27   | 27   | -    | 89.7 | 90.8 | 91.2 |
| 7 ' <i>R. angustus</i> ' <sup>1</sup>    | HG792871      | 18 | 18  | 19   | 19   | 19   | 27   | -    | 91.6 | 92.0 |
| 8 ' <i>R. kingi</i> ' <sup>1</sup>       | HG792872      | 20 | 20  | 17   | 19   | 19   | 24   | 22   | -    | 98.1 |
| 9 ' <i>R. sculptus</i> ' <sup>1</sup>    | HG792873      | 19 | 19  | 16   | 18   | 18   | 23   | 20   | 5    | -    |

<sup>1</sup>262 aa

TABLE S6 Pairwise comparison of the number of nucleotide differences (lower diagonal) and percent sequence similarity (upper diagonal) of *sucB* between different members of the genus *Rickettsiella*

| Taxon                                    | Accession no. | 1   | 2   | 3    | 4    | 5    | 6    | 7    | 8    | 9    |
|------------------------------------------|---------------|-----|-----|------|------|------|------|------|------|------|
| 1 ' <i>R. costelytrae</i> ' <sup>1</sup> | JN565690      | -   | 100 | 93.6 | 93.7 | 74.7 | 78.1 | 78.5 | 78.1 | 78.2 |
| 2 ' <i>R. pyronotae</i> ' <sup>1</sup>   | JN565692      | 0   | -   | 93.6 | 93.7 | 74.7 | 78.1 | 78.5 | 78.1 | 78.2 |
| 3 ' <i>R. tipulae</i> ' <sup>2</sup>     | JF288931      | 57  | 57  | -    | 94.5 | 97.2 | 74.6 | 77.9 | 77.8 | 76.5 |
| 4 ' <i>R. melolonthae</i> ' <sup>2</sup> | EF694044      | 56  | 56  | 49   | -    | 95.6 | 74.9 | 78.2 | 77.8 | 77.1 |
| 5 ' <i>R. agriotidis</i> ' <sup>3</sup>  | JN565688      | 49  | 49  | 25   | 39   | -    | 74.8 | 79.3 | 78.1 | 77.8 |
| 6 ' <i>R. ixodidis</i> ' <sup>4</sup>    | JQ070347      | 234 | 234 | 315  | 232  | 234  | -    | 78.9 | 82.0 | 82.0 |
| 7 ' <i>R. angustus</i> ' <sup>5</sup>    | HG792874      | 196 | 196 | 206  | 204  | 193  | 198  | -    | 82.6 | 83.0 |
| 8 ' <i>R. kingi</i> ' <sup>6</sup>       | HG792875      | 203 | 203 | 206  | 206  | 203  | 168  | 162  | -    | 96.0 |
| 9 ' <i>R. sculptus</i> ' <sup>6</sup>    | HG792876      | 194 | 194 | 218  | 213  | 206  | 168  | 158  | 37   | -    |

<sup>1</sup>855 bp, <sup>2</sup>892 bp, <sup>3</sup>891 bp, <sup>4</sup>924 bp, <sup>5</sup>931 bp, <sup>6</sup>855 bp

TABLE S7 Pairwise comparison of the number of amino acid differences (lower diagonal) and percent sequence similarity (upper diagonal) of *sucB* between different members of the genus *Rickettsiella*

| Taxon                                    | Accession no. | 1  | 2   | 3    | 4    | 5    | 6    | 7    | 8    | 9    |
|------------------------------------------|---------------|----|-----|------|------|------|------|------|------|------|
| 1 ' <i>R. costelytrae</i> ' <sup>1</sup> | JN565690      | -  | 100 | 95.6 | 94.6 | 97.3 | 76.7 | 82.6 | 78.4 | 77.1 |
| 2 ' <i>R. pyronotae</i> ' <sup>1</sup>   | JN565692      | 0  | -   | 95.6 | 94.6 | 97.3 | 76.7 | 82.6 | 78.4 | 77.1 |
| 3 ' <i>R. tipulae</i> ' <sup>2</sup>     | JF288931      | 13 | 13  | -    | 91.1 | 97.0 | 74.4 | 80.6 | 76.1 | 74.5 |
| 4 ' <i>R. melolonthae</i> ' <sup>2</sup> | EF694044      | 16 | 16  | 24   | -    | 94.3 | 76.1 | 81.9 | 77.4 | 75.5 |
| 5 ' <i>R. agriotidis</i> ' <sup>2</sup>  | JN565688      | 8  | 8   | 9    | 17   | -    | 76.7 | 82.3 | 77.4 | 75.8 |
| 6 ' <i>R. ixodidis</i> ' <sup>3</sup>    | JQ070347      | 72 | 72  | 77   | 74   | 72   | -    | 81.7 | 82.9 | 82.3 |
| 7 ' <i>R. angustus</i> ' <sup>4</sup>    | HG792874      | 54 | 54  | 60   | 56   | 55   | 57   | -    | 84.8 | 81.2 |
| 8 ' <i>R. kingi</i> ' <sup>5</sup>       | HG792875      | 67 | 67  | 74   | 70   | 70   | 53   | 47   | -    | 93.9 |
| 9 ' <i>R. sculptus</i> ' <sup>5</sup>    | HG792876      | 71 | 71  | 79   | 76   | 75   | 55   | 46   | 19   | -    |

<sup>1</sup>295 aa, <sup>2</sup>297 aa, <sup>3</sup>308 aa, <sup>4</sup>310 aa, <sup>5</sup>309 aa
